# Supplementary figures and images for: Expression of HIV-1 antigens in plants as potential subunit vaccines
Source: Springer Nature journal article supplement (doi:10.1186/1472-6750-8-53), 2008-06-23

**(A) gag**

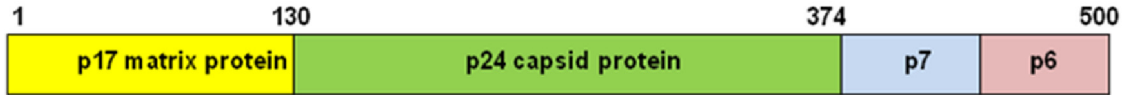

**(B) p17/24**

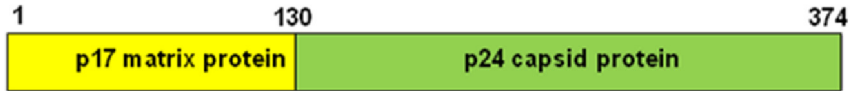

**(C) p24**

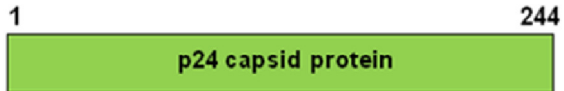

Supplement: 12896_2007_322_MOESM1_ESM.pdf [file 12896_2007_322_MOESM1_ESM.pdf]

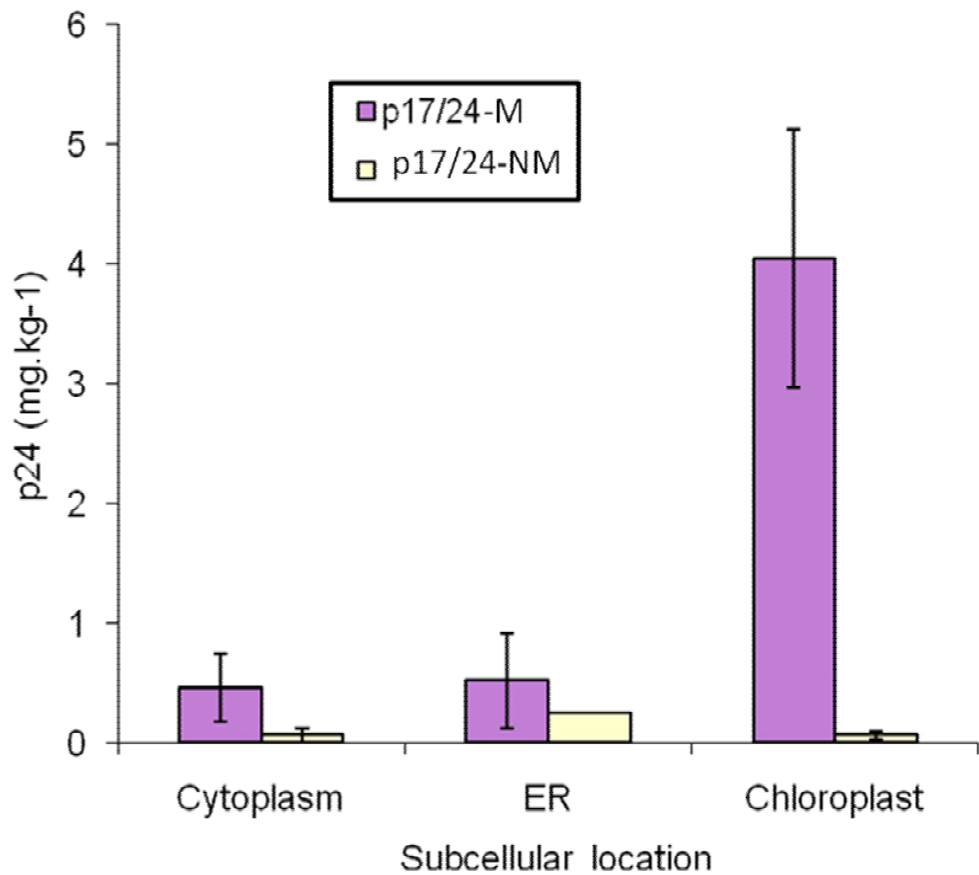

Supplement: 12896_2007_322_MOESM2_ESM.pdf [file 12896_2007_322_MOESM2_ESM.pdf]

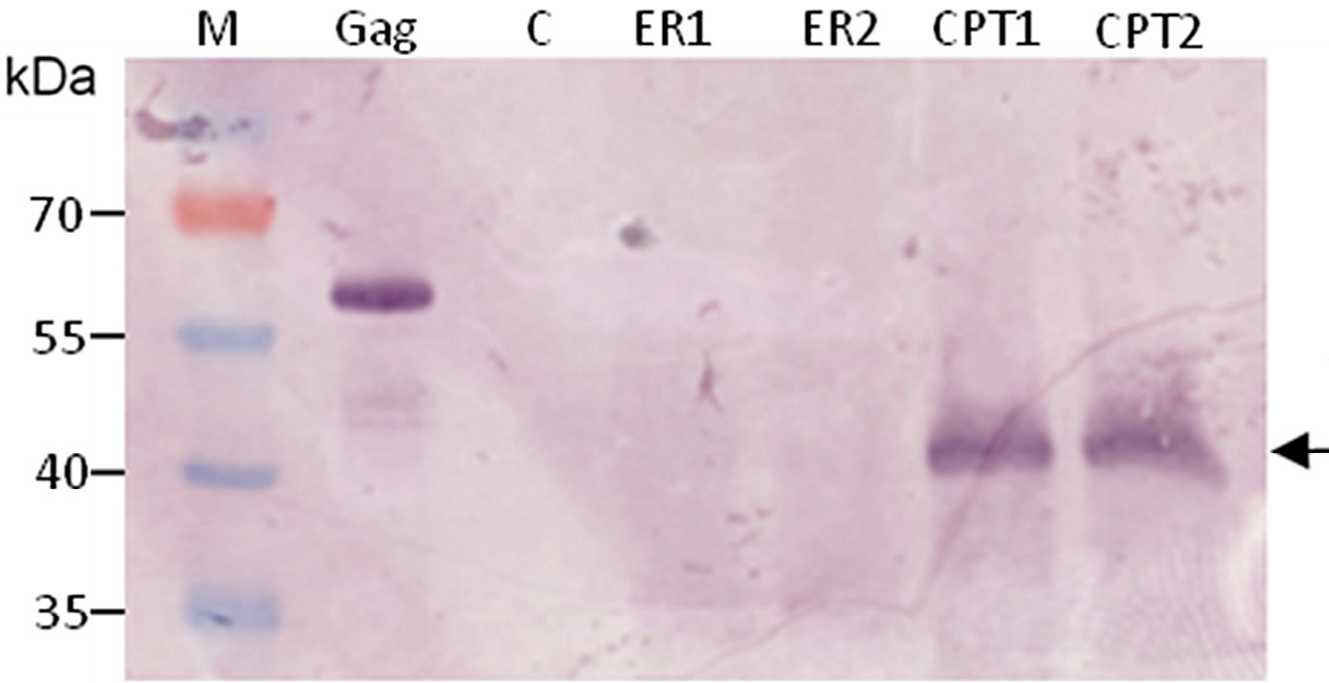

Supplement: 12896_2007_322_MOESM3_ESM.pdf [file 12896_2007_322_MOESM3_ESM.pdf]

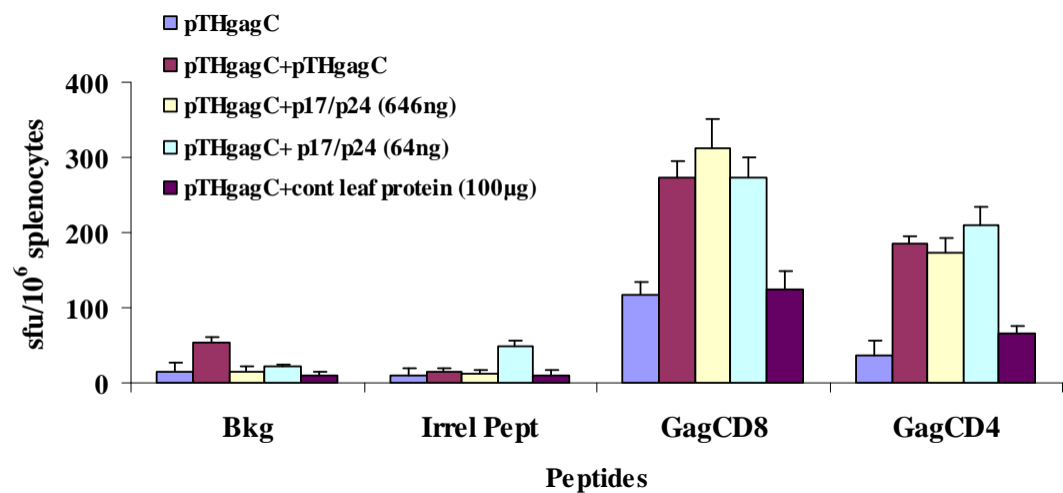

Supplement: 12896_2007_322_MOESM4_ESM.pdf [file 12896_2007_322_MOESM4_ESM.pdf]

(A) Absorbance values

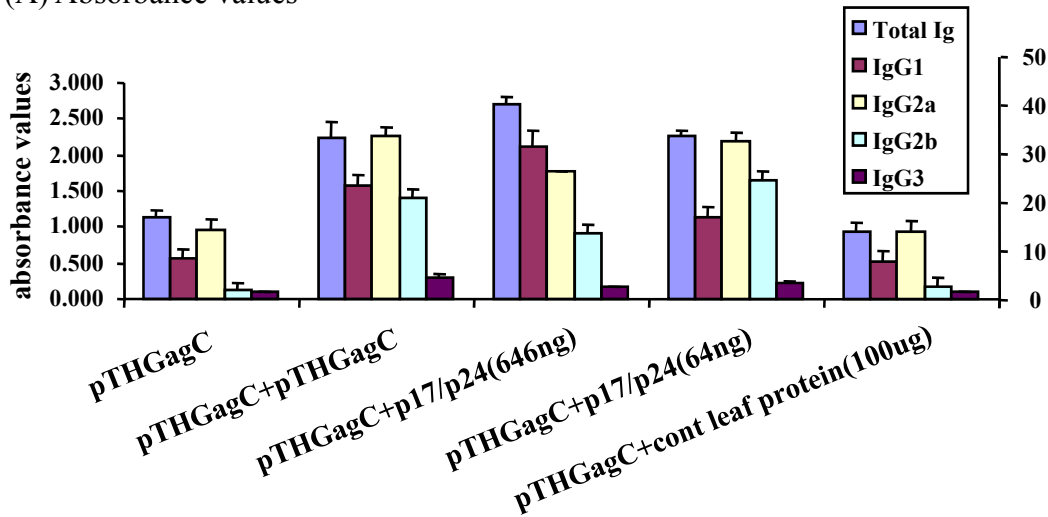

(B) Ratio IgG2a/IgG1

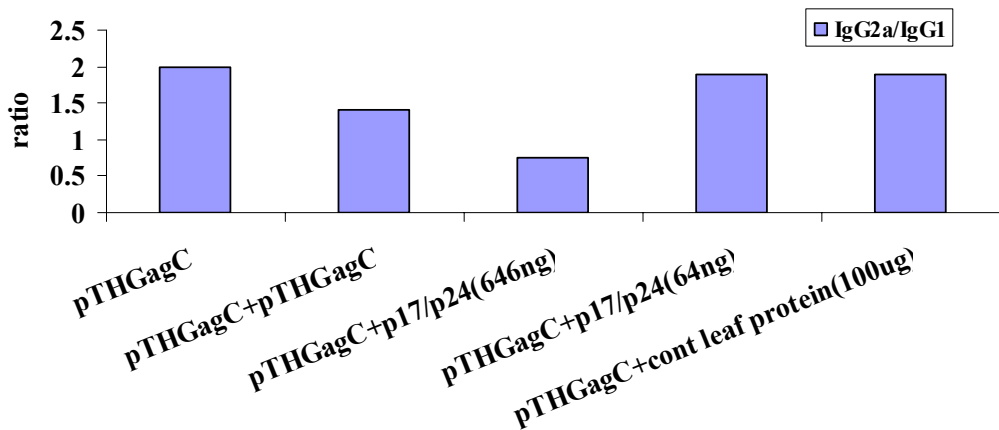

Supplement: 12896_2007_322_MOESM5_ESM.pdf [file 12896_2007_322_MOESM5_ESM.pdf]

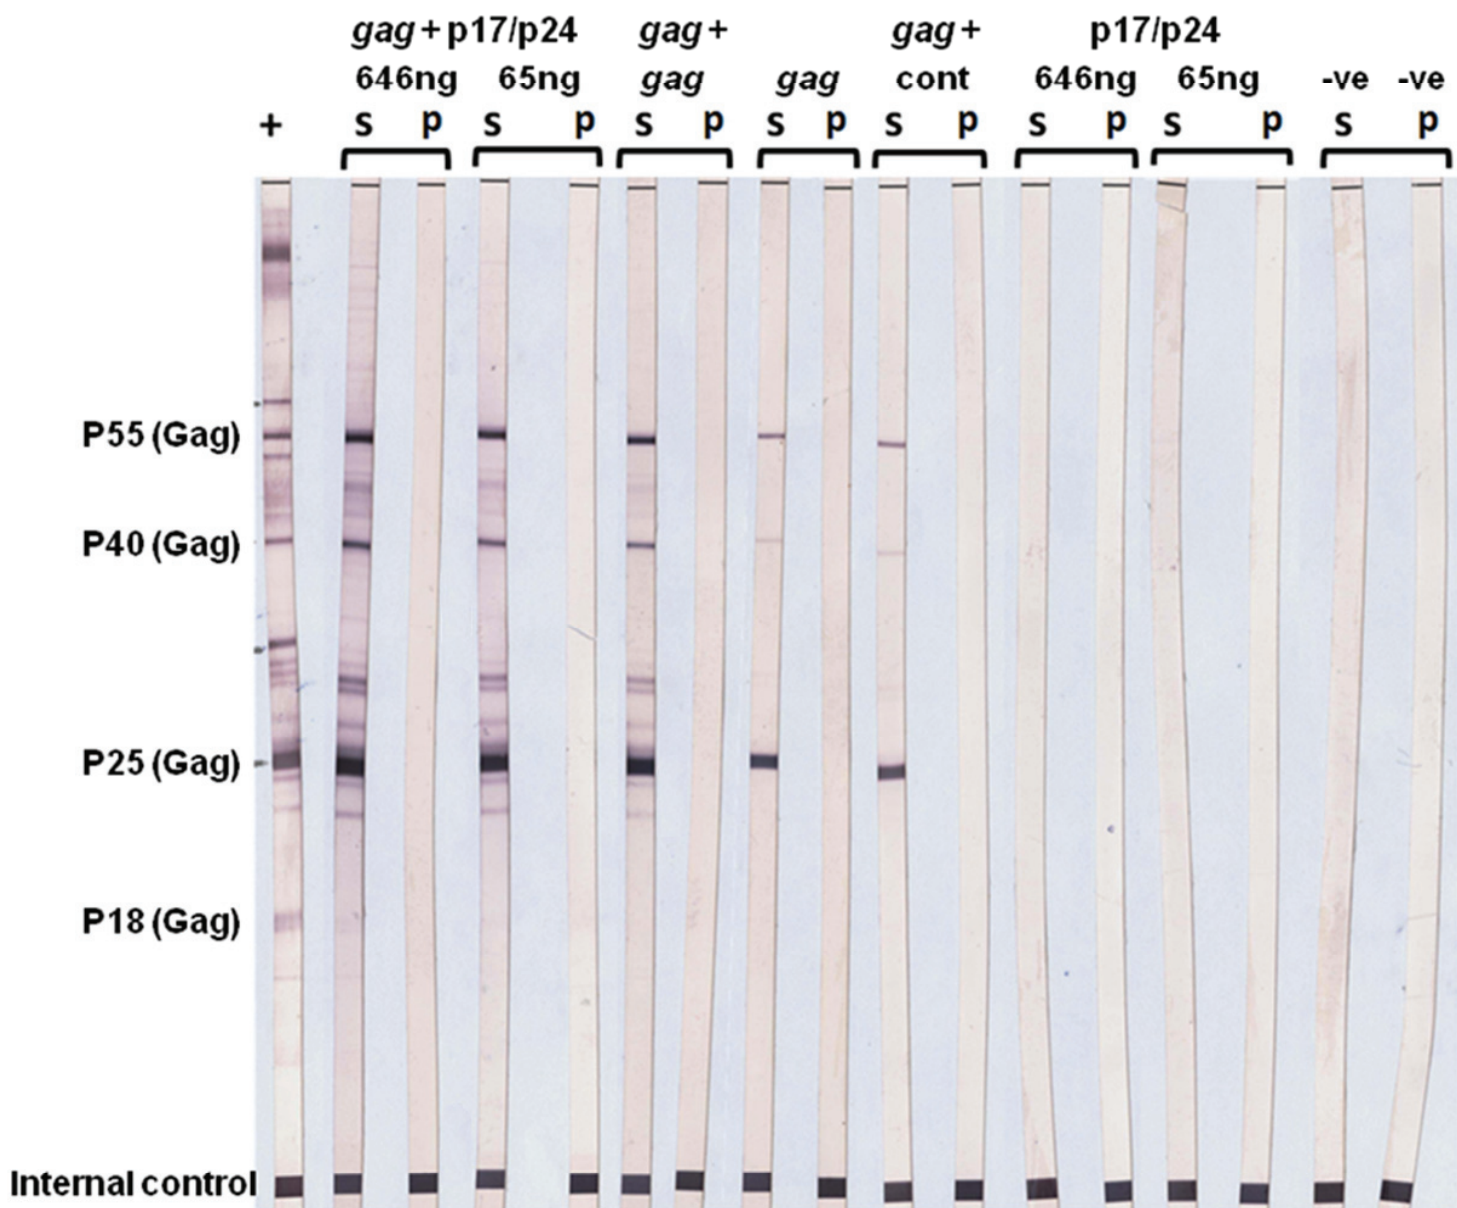

Supplement: 12896_2007_322_MOESM6_ESM.pdf [file 12896_2007_322_MOESM6_ESM.pdf]
